# Supplementary material for: An Infection-Tolerant Mammalian Reservoir for Several Zoonotic Agents Broadly Counters the Inflammatory Effects of Endotoxin
Source: PubMed Central journal article supplement (PMC8092257; doi:10.1128/mbio.00588-21), 2021-04-13

A. Blood

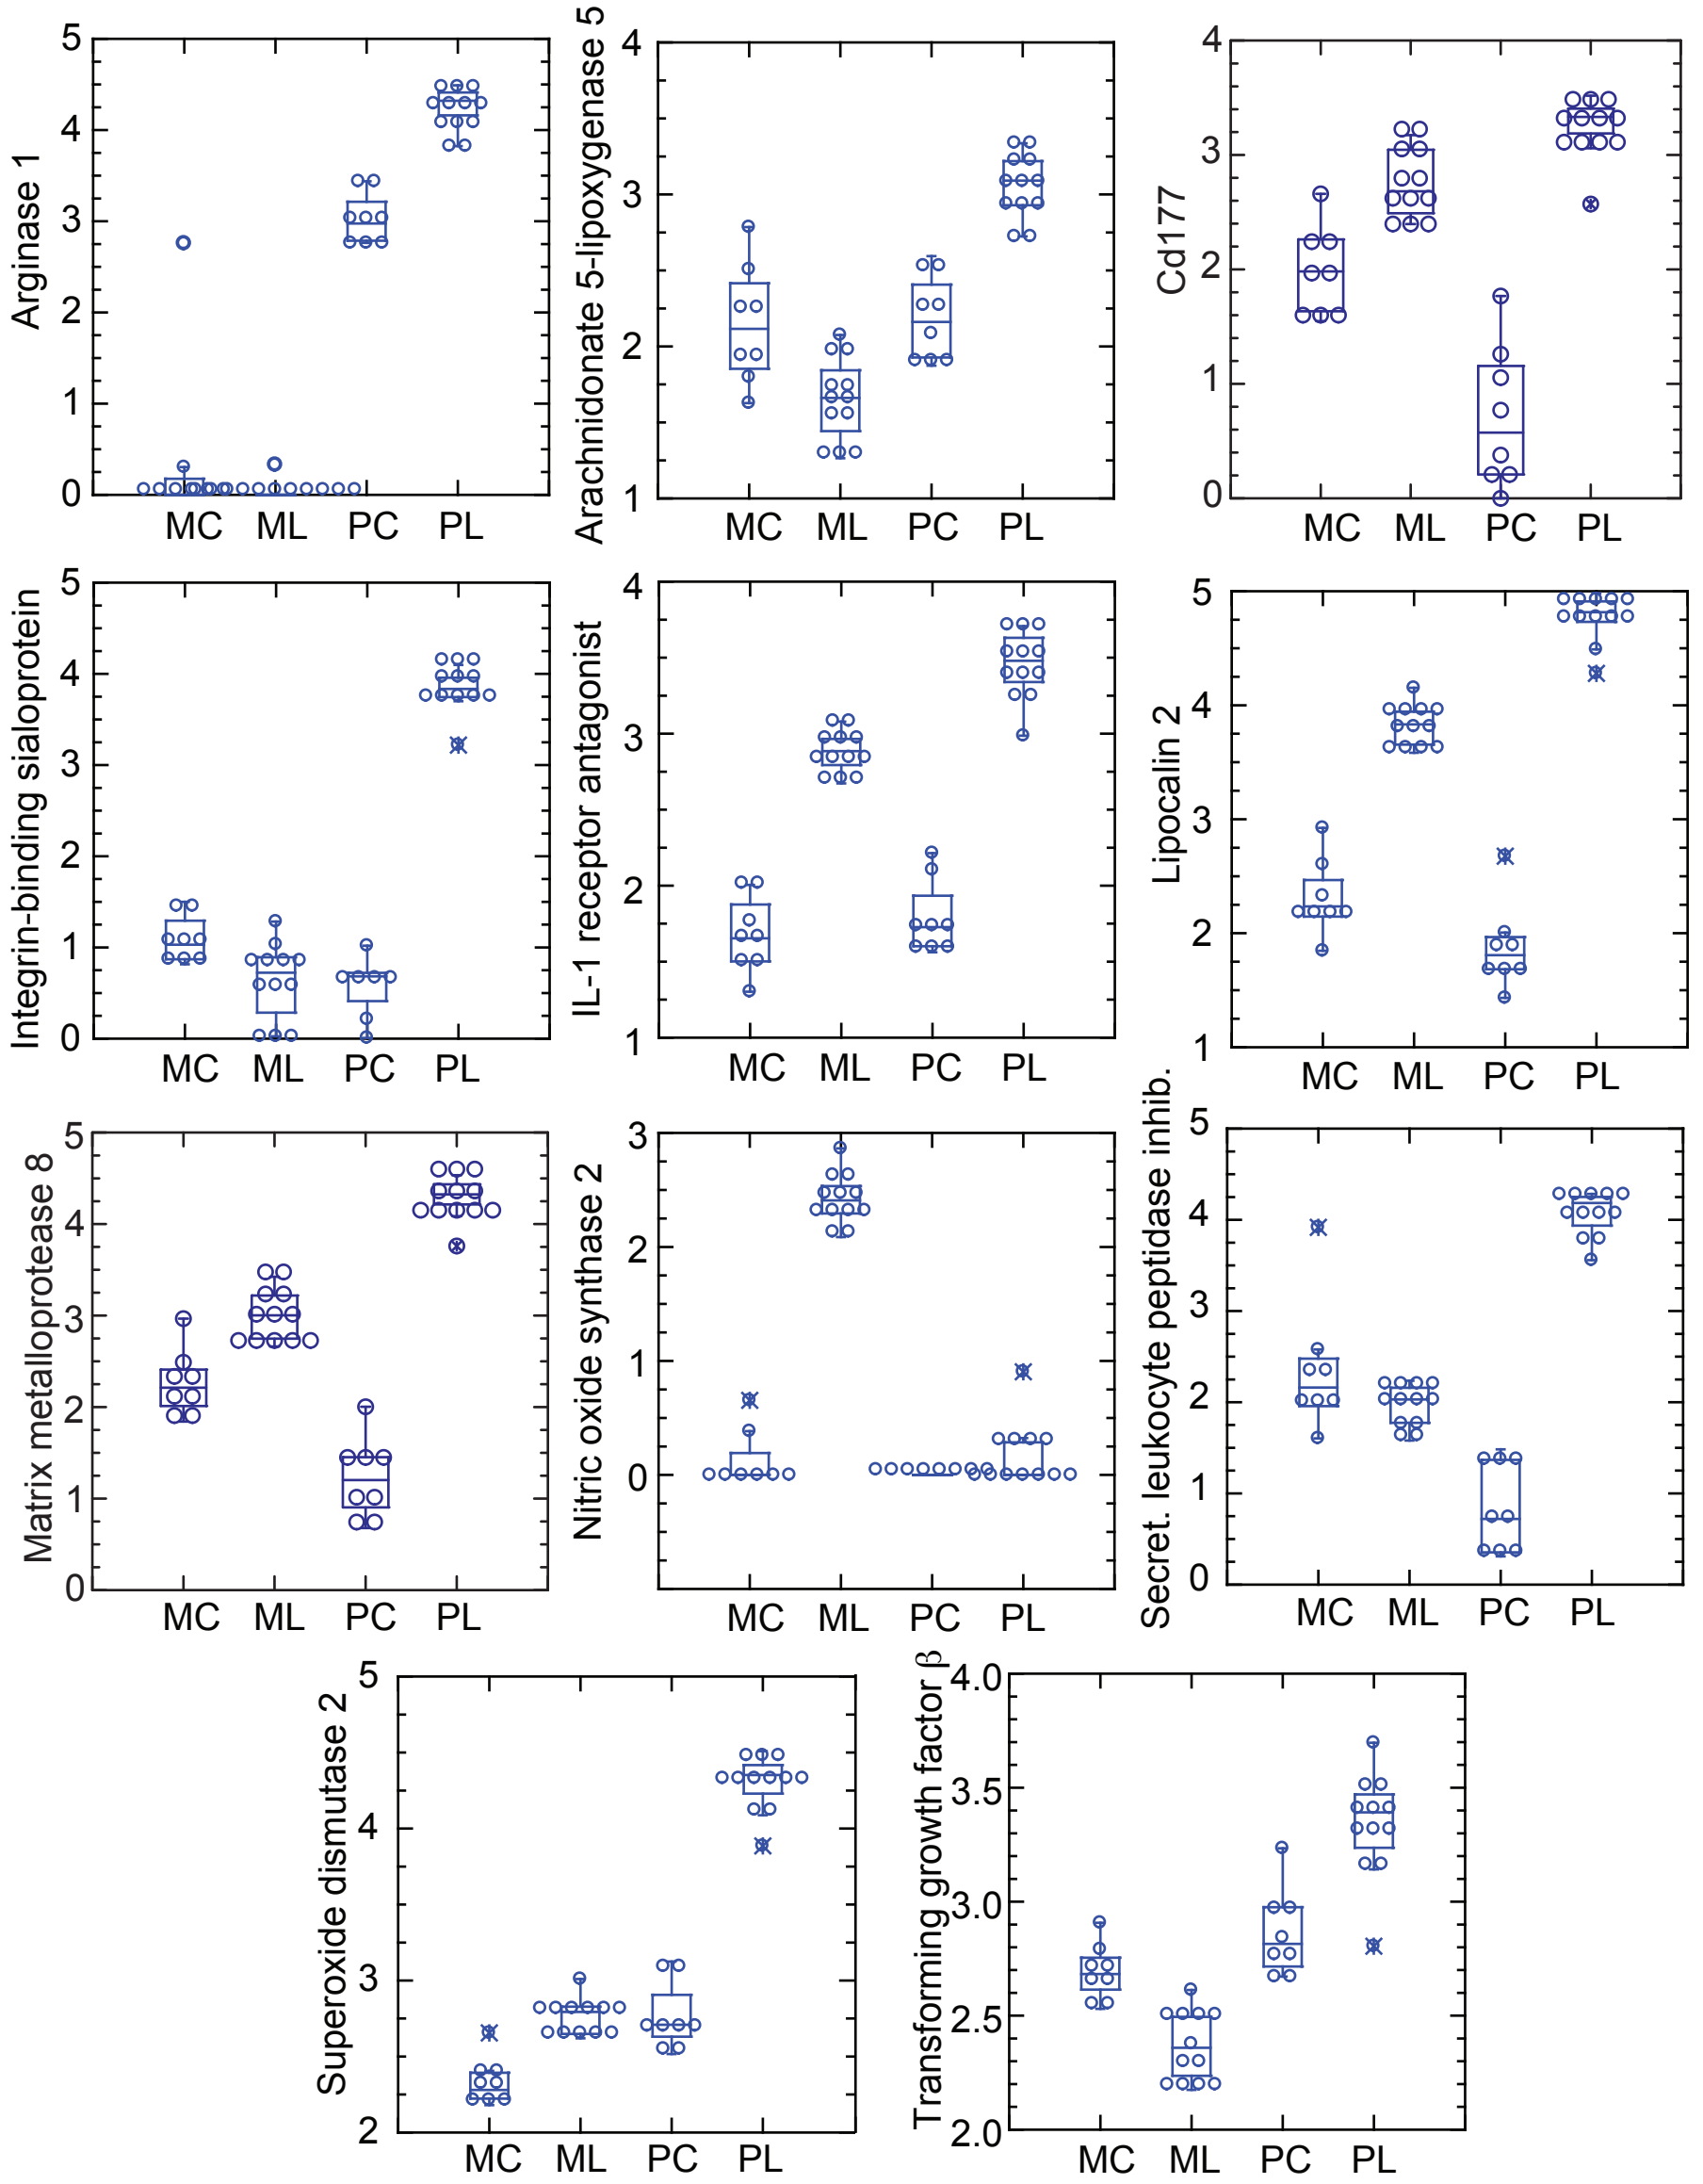

## B. Spleen

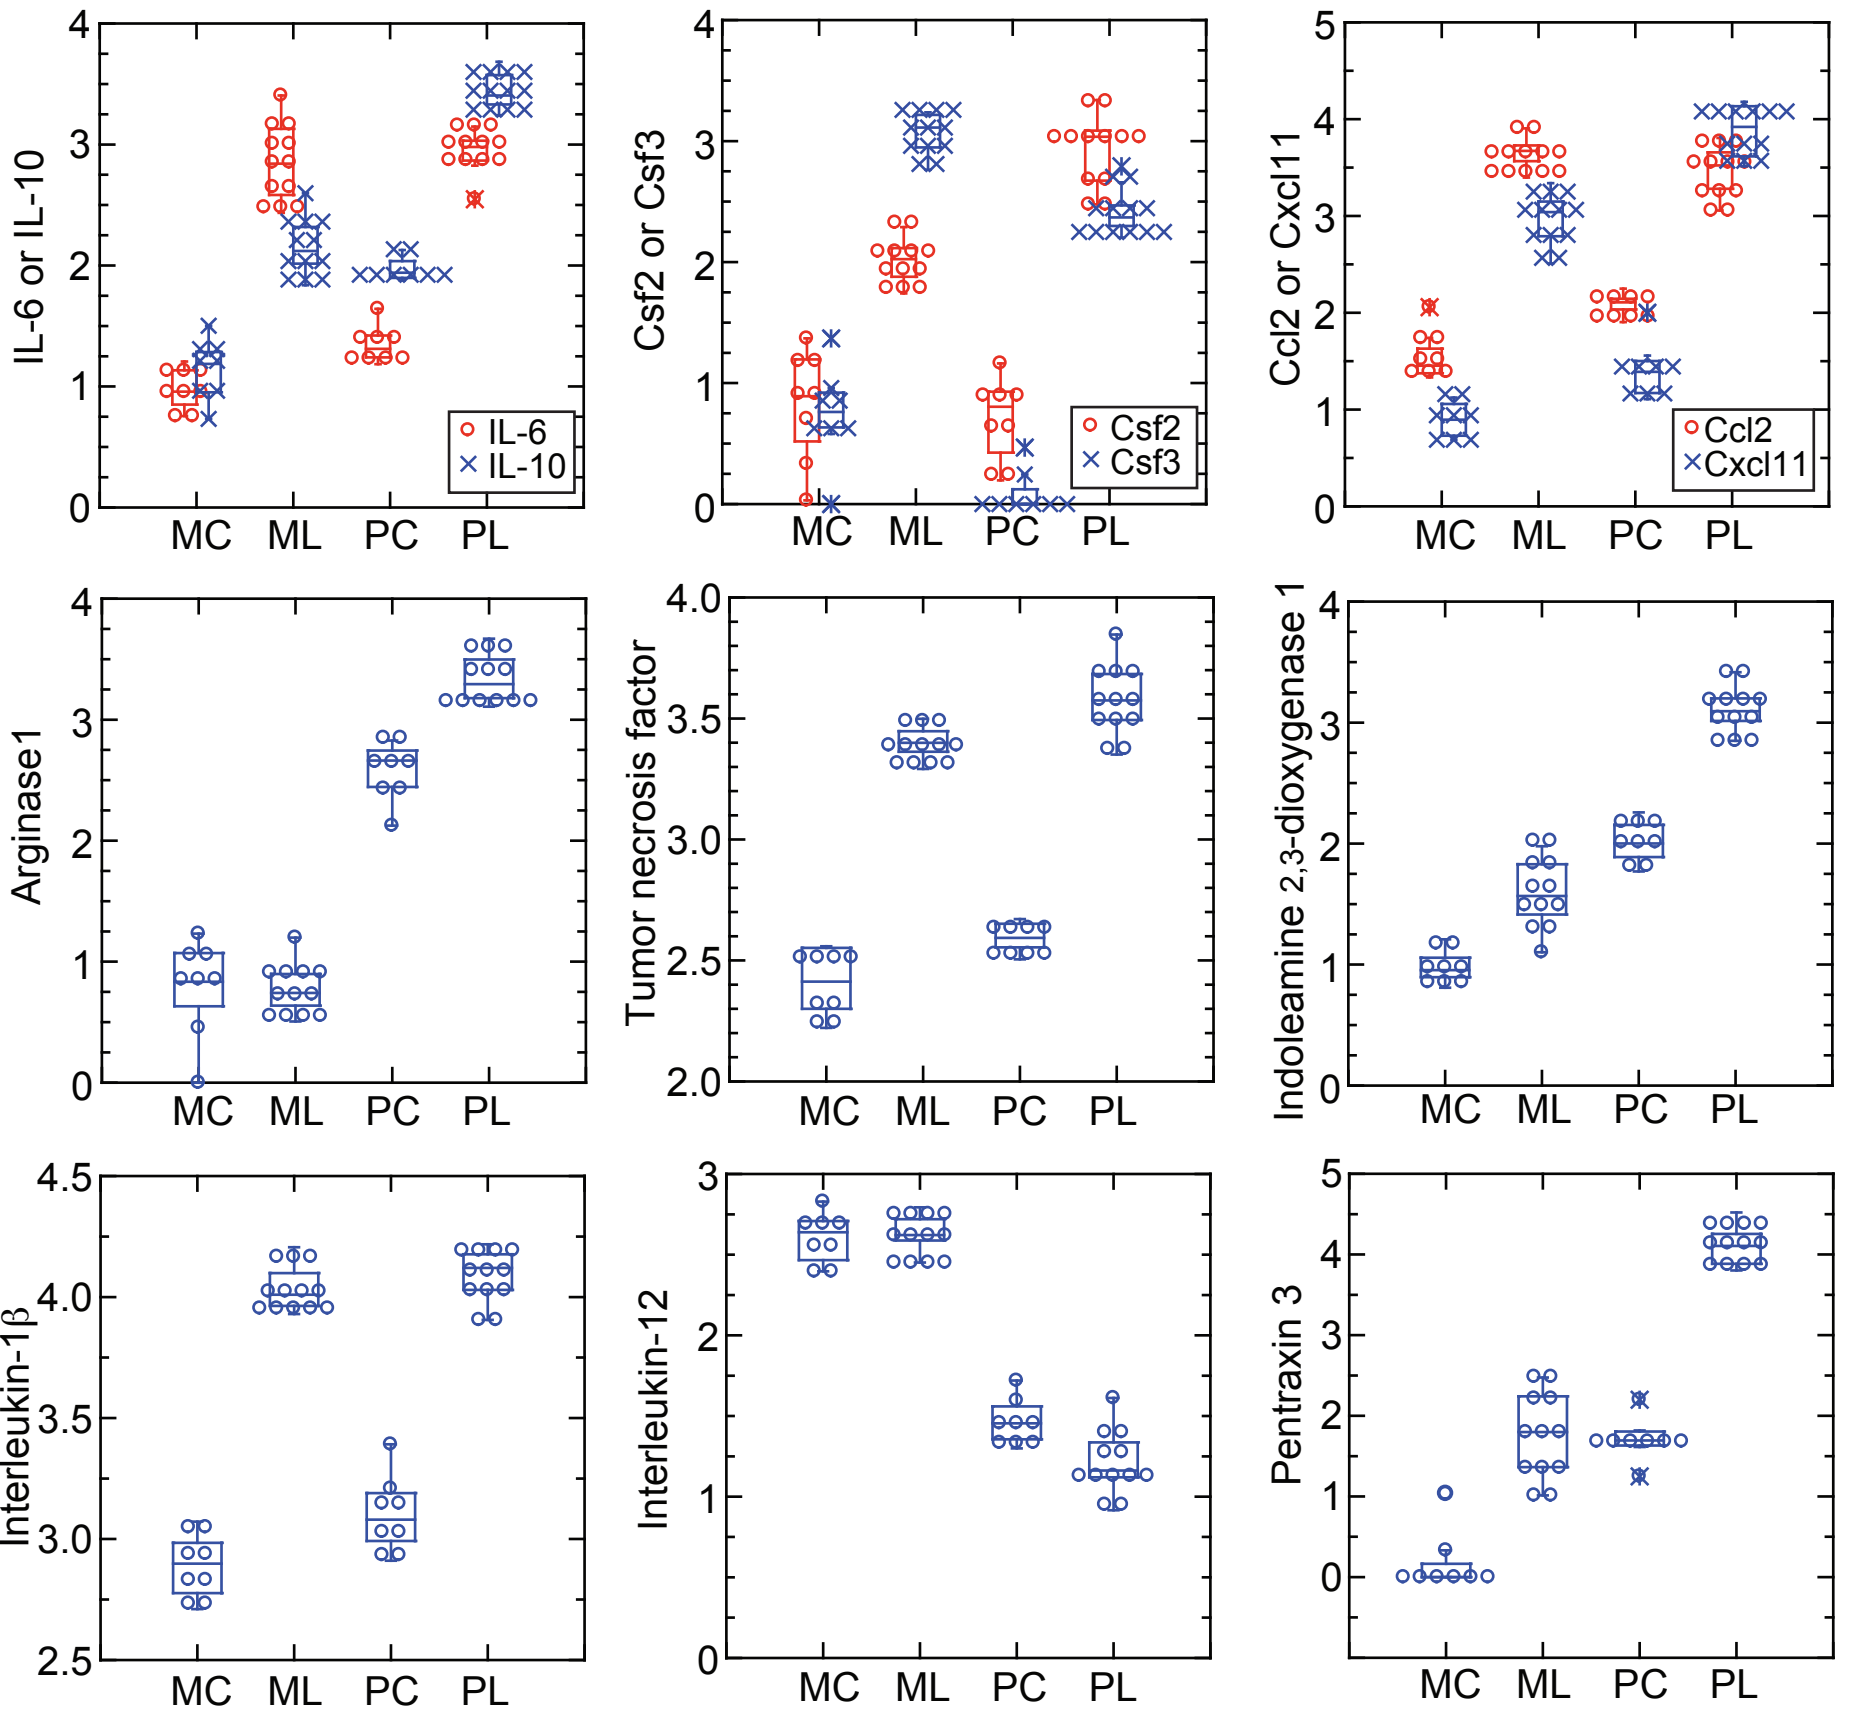

C. Liver

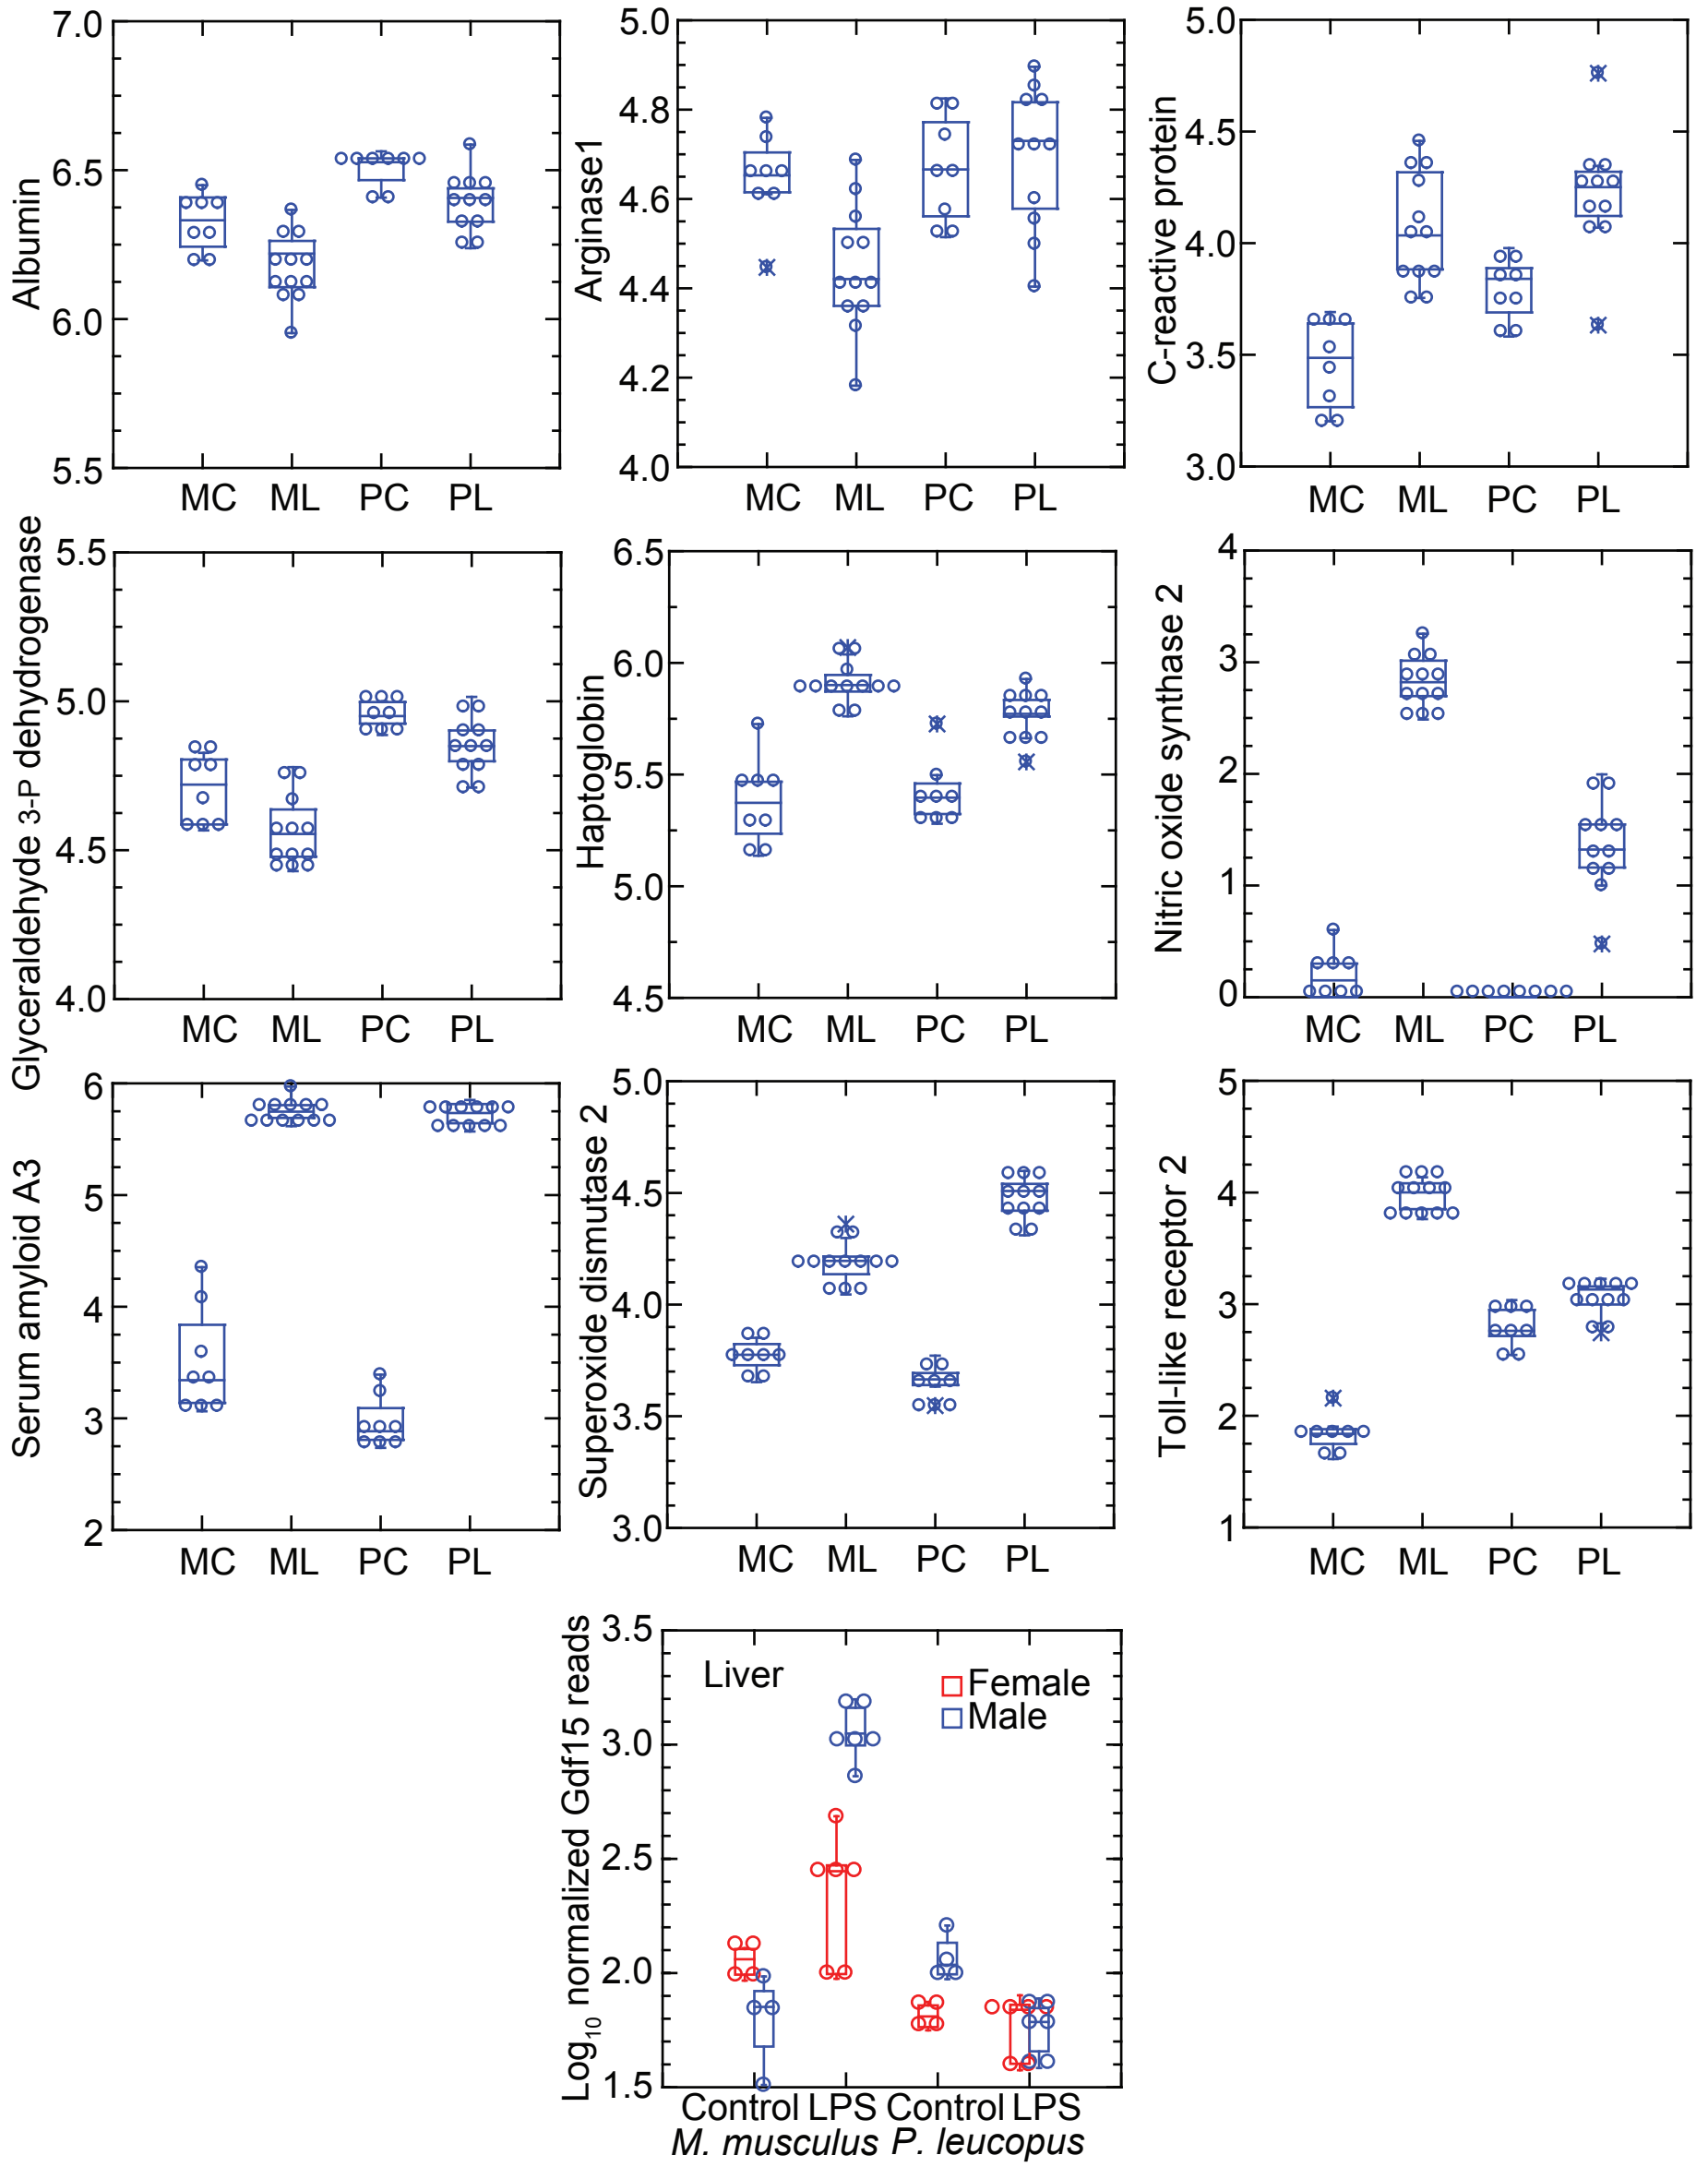

Supplement: mBio.00588-21_sf002.pdf [file mBio.00588-21_sf002.pdf]
